# Supplementary material for: Expression of Pinopodes in the Endometrium from Recurrent Pregnancy Loss Women. Role of Thrombomodulin and Ezrin
Source: MDPI journal article supplement (doi:10.3390/jcm9082634), 2020-08-13
Supplement: s1 [file s1]

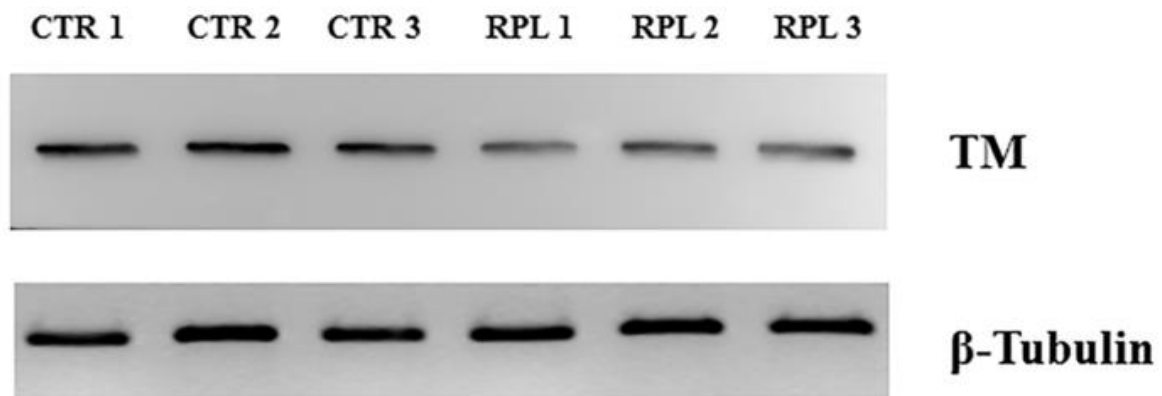

**Figure S1.** Western blot analysis. Full length gels obtained from RPL and CTR women for the analysis of TM. TM: thrombomodulin; CTR: control women; RPL: recurrent pregnancy loss women.

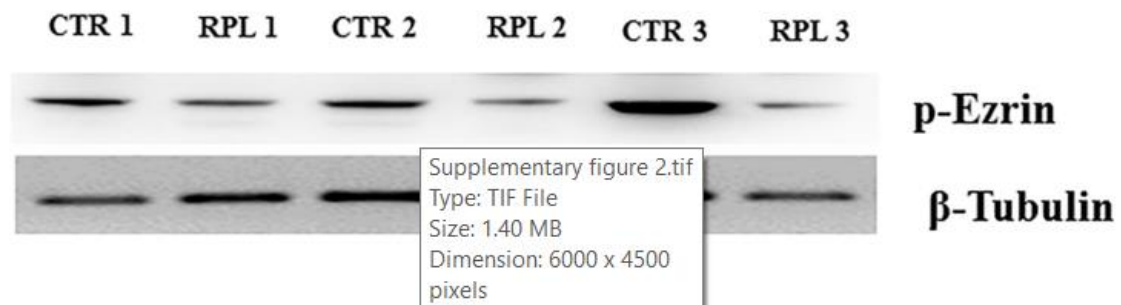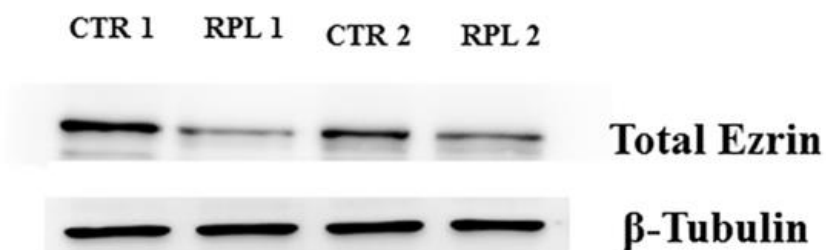

**Figure S2.** Western blot analysis. Full length gels obtained from RPL and CTR women for the analysis of phosphorylated and total ezrin. *p*-ezrin: phosphorylated ezrin; CTR: control women; RPL: recurrent pregnancy loss women.
